# Supplementary material for: Wing reduction and body size variation along a steep elevation gradient: a case study with Magellanic sub-Antarctic mayflies and stoneflies
Source: Frontiers journal article supplement (doi:10.3389/fevo.2023.1188889), 2023-07-07
Supplement: Table_1.XLSX [file Table_1.XLSX]

## Sheet: Elevation-species interaciton
		WL				BL				RWL
	Ephemeroptera	Estimate	Std. Error	t value	Pr(>|t|)	Estimate	Std. Error	t value	Pr(>|t|)	Estimate	Std. Error	t value	Pr(>|t|)
	Elevation*Andesiops torrens	0.299	0.155	1.933	ns	0.208	0.149	1.399	ns	0.002	0.019	0.099	ns
	Elevation*Massartelopsis irarrazavali	0.529	0.21	2.518	*	0.867	0.202	4.296	***	-0.026	0.026	-0.988	ns
	Elevation*Meridialaris chiloeensis	0.514	0.167	3.074	**	0.586	0.16	3.65	***	0.002	0.021	0.107	ns
	Elevation*Metamonius anceps	-0.065	0.21	-0.31	ns	0.868	0.202	4.3	***	-0.043	0.026	1.652	ns
		WL				BL				RWL
	Plecoptera	Estimate	Std. Error	t value	Pr(>|t|)	Estimate	Std. Error	t value	Pr(>|t|)	Estimate	Std. Error	t value	Pr(>|t|)
	Elevation*Limnoperla jaffueli	-0.214	0.109	-1.954	ns	-0.495	0.118	-4.192	***	0.034	0.026	1.304	ns
	Elevation*Rhithroperla rossi	-0.025	0.125	-0.202	ns	-0.392	0.135	-2.913	**	0.043	0.029	1.451	ns
	Elevation*Senzilloides panguipulli	0.582	0.145	4.002	***	0.718	0.157	4.569	***	0.006	0.034	0.162	ns
	Elevation*Udamocercia antarctica	-0.021	0.166	-0.127	ns	-0.471	0.18	-2.619	**	0.064	0.039	1.628	ns
